# Supplementary material
Source: Springer Nature journal article supplement (https://www.springermedizin.de/resource/supplementary/13256_2008_524_MOESM1_ESM.pdf/9646176)

C: 680

B: 343

F: 8%

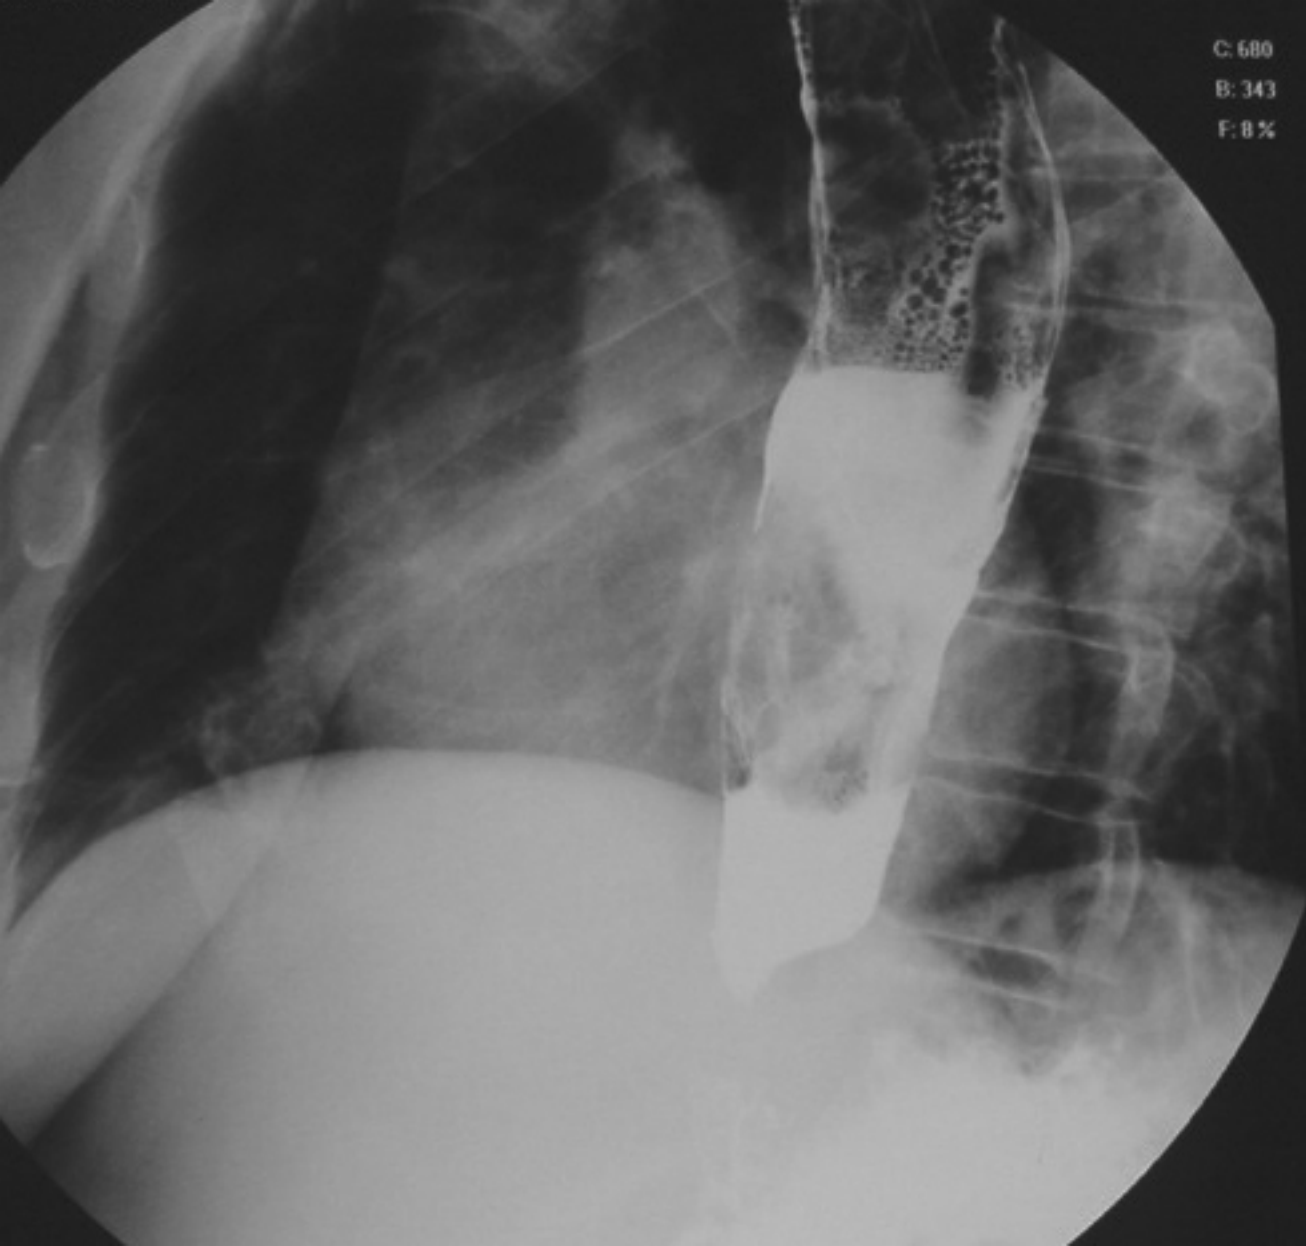

Supplement: MOESM1 [file 9646176]
